# Supplementary material for: Highly efficient and thermally stable cyan-emitting ZnS/ZnO phosphors for full-visible-spectrum LED lighting
Source: Royal Society of Chemistry journal article supplement (doi:10.1039/d4ra08038f), 2025-01-01
Supplement: d4ra08038f1.pdf [file d4ra08038f1.pdf]

## Supplement Information

---

# Highly efficient and thermally stable cyan-emitting ZnS/ZnO phosphors for full-visible-spectrum LED lighting

Do Quang Trung<sup>a,\*</sup>, Manh Trung Tran<sup>b,\*</sup>, Nguyen Van Du<sup>a</sup>, Nguyen Duy Hung<sup>c</sup>, Tong Thi Hao Tam<sup>d</sup>,  
Nguyen Tu<sup>a</sup>, Pham Minh Tri<sup>b</sup>, Hoang Gia Chuc<sup>b</sup>, Nguyen Duc Trung Kien<sup>e</sup>, Nguyen Van Quang<sup>f</sup>,  
Pham Thanh Huy<sup>b</sup>

<sup>a</sup>Faculty of Fundamental Sciences, Phenikaa University, Yen Nghia, Ha-Dong district, Hanoi 10000, Vietnam

<sup>b</sup>Faculty of Materials Science and Engineering, Phenikaa University, Yen Nghia, Ha-Dong district, Hanoi 10000, Vietnam

<sup>c</sup>Faculty of Electronic Materials and Components, School of Materials Science and Engineering, Hanoi University of Science and Technology (HUST), No. 01 Dai Co Viet, Hanoi 10000, Vietnam

<sup>d</sup>School of Information Technology and Digital Economics (SITDE), National Economics University (NEU), 207 Giai Phong Street, Hanoi 10000, Vietnam

<sup>e</sup>Faculty of Electrical and Electronic Engineering, Phenikaa University, Yen Nghia, Ha-Dong district, Hanoi 10000, Vietnam

<sup>f</sup>Department of Chemistry, Hanoi Pedagogical University 2, Phuc Yen, Vinh Phuc, Vietnam

\* Corresponding author:

Email address: [trung.doquang@phenikaa-uni.edu.vn](mailto:trung.doquang@phenikaa-uni.edu.vn) and [trung.tranmanh@phenikaa-uni.edu.vn](mailto:trung.tranmanh@phenikaa-uni.edu.vn);

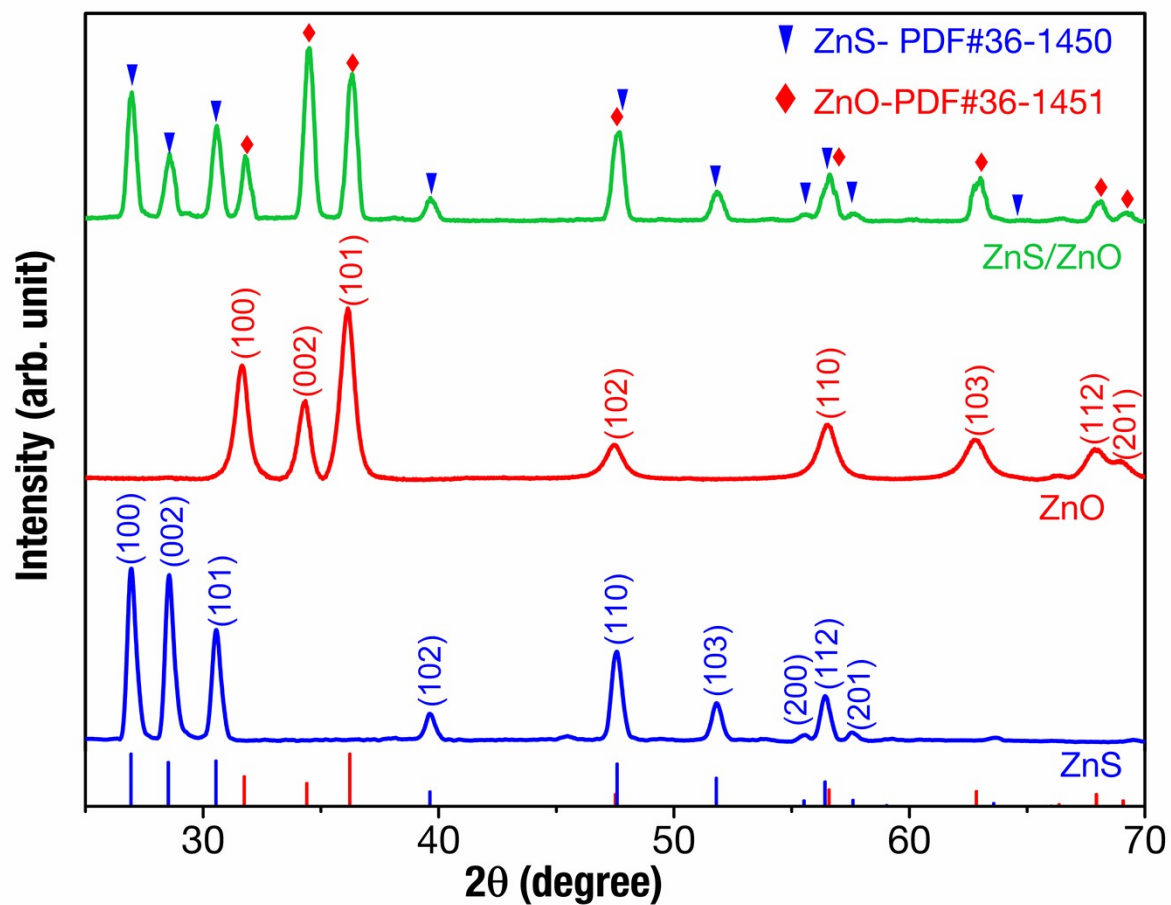

Fig. S1. The XRD patterns of the commercial ZnS, ZnO, and ZnS/ZnO phosphor powders anneal at 1000 °C for 2 hours in an Ar gas environment.

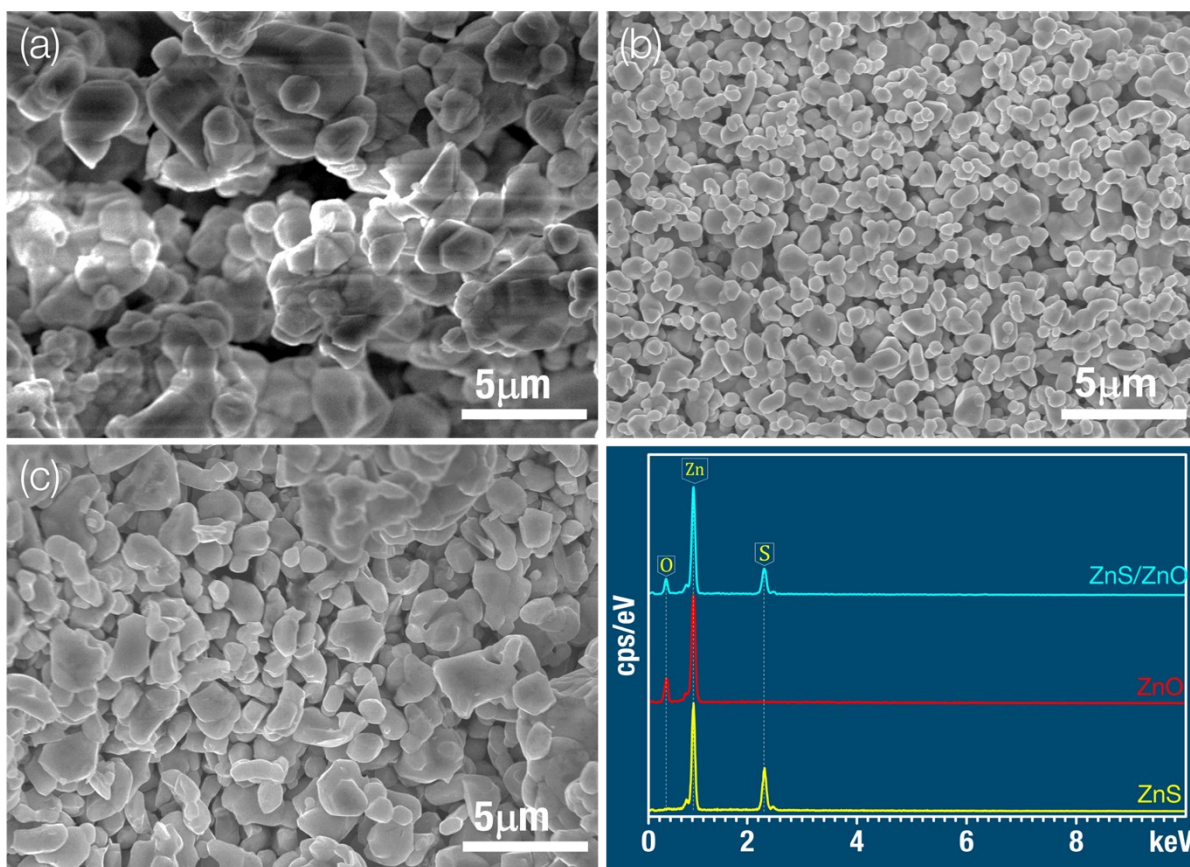

**Fig. S2.** The FESEM images of (a) ZnS, (b) ZnO, (c) ZnS/ZnO annealed at 1000 °C for 2 hours in an Ar gas environment, and (d) their EDS spectra, respectively.

**Table S1.** Atomic ratio of Zn, S, O elements in ZnS, ZnO and ZnS/ZnO samples

| Elements  | ZnS  | ZnO  | ZnS/ZnO |
|-----------|------|------|---------|
| <b>Zn</b> | 51.1 | 57.8 | 47.7    |
| <b>S</b>  | 47.5 | 42.2 | 24.7    |
| <b>O</b>  | 1.4  | --   | 27.6    |

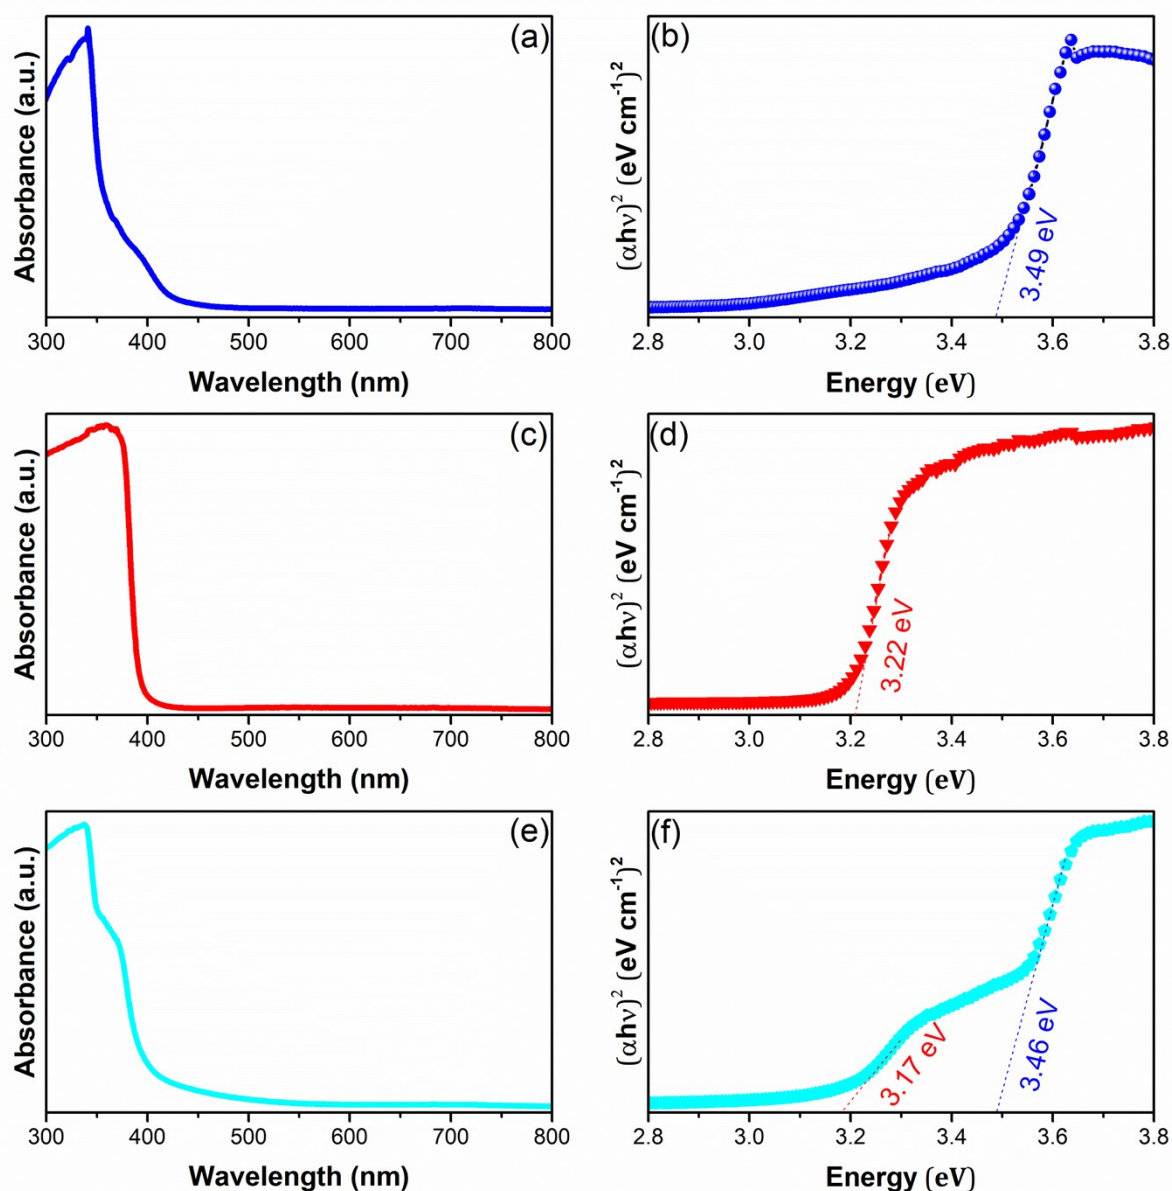

**Fig. S3.** UV-Vis spectra of ZnS, ZnO, and ZnS/ZnO, along with their Tauc plots of  $(\alpha h\nu)^2$  versus E.

Table S2 presents the bandgap values of ZnS, ZnO, and ZnS/ZnO phosphors derived from Fig. S3. The bandgap of the ZnS phase is 3.49 eV, while the ZnO phase shows a bandgap of 3.22 eV. For the ZnS/ZnO composite, the ZnS and ZnO phases exhibit bandgaps of 3.46 eV and 3.17 eV, respectively, indicating slight modifications in the bandgap of each phase within the composite material.

**Table S2.** The bandgap of ZnS, ZnO, and ZnS/ZnO phosphors derived from Fig. S3

| Samples   | Bandgap (eV) |      |         |
|-----------|--------------|------|---------|
|           | ZnS          | ZnO  | ZnS/ZnO |
| ZnS phase | 3.49         | --   | 3.46    |
| ZnO phase | --           | 3.22 | 3.17    |

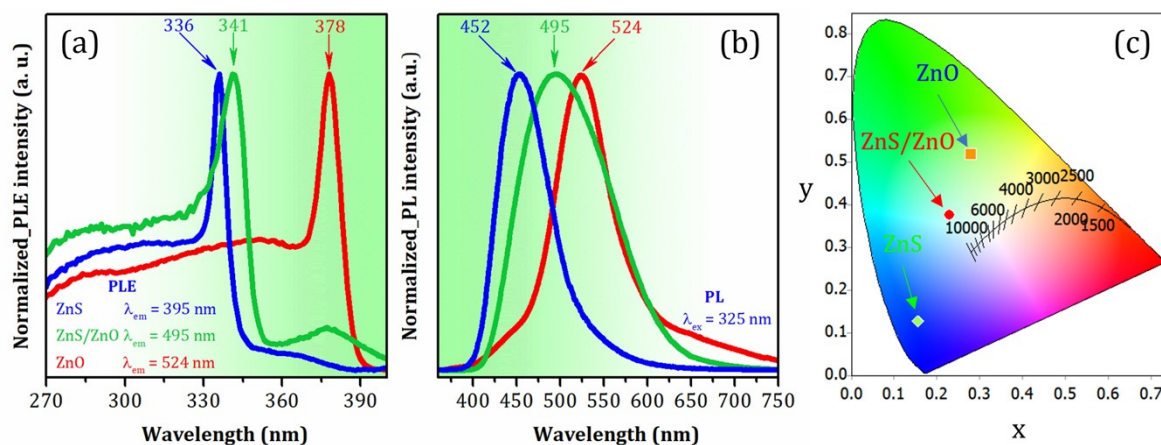

**Fig. S4.** (a) PLE and (b) PL spectra of ZnS, ZnO, and ZnS/ZnO phosphors; (c) Corresponding CIE 1931 chromaticity diagram for ZnS, ZnO, and ZnS/ZnO phosphors.

**Table S3.** Optical parameters of ZnS/ZnO, ZnS, and ZnO samples annealed under identical conditions

| Sample  | x       | y      | CRI | CCT     |
|---------|---------|--------|-----|---------|
| ZnS     | 0.1556  | 0.1267 | --  | >100000 |
| ZnO     | 0.2792  | 0.5191 | 44  | --      |
| ZnS/ZnO | 0.23002 | 0.3760 | 50  | --      |

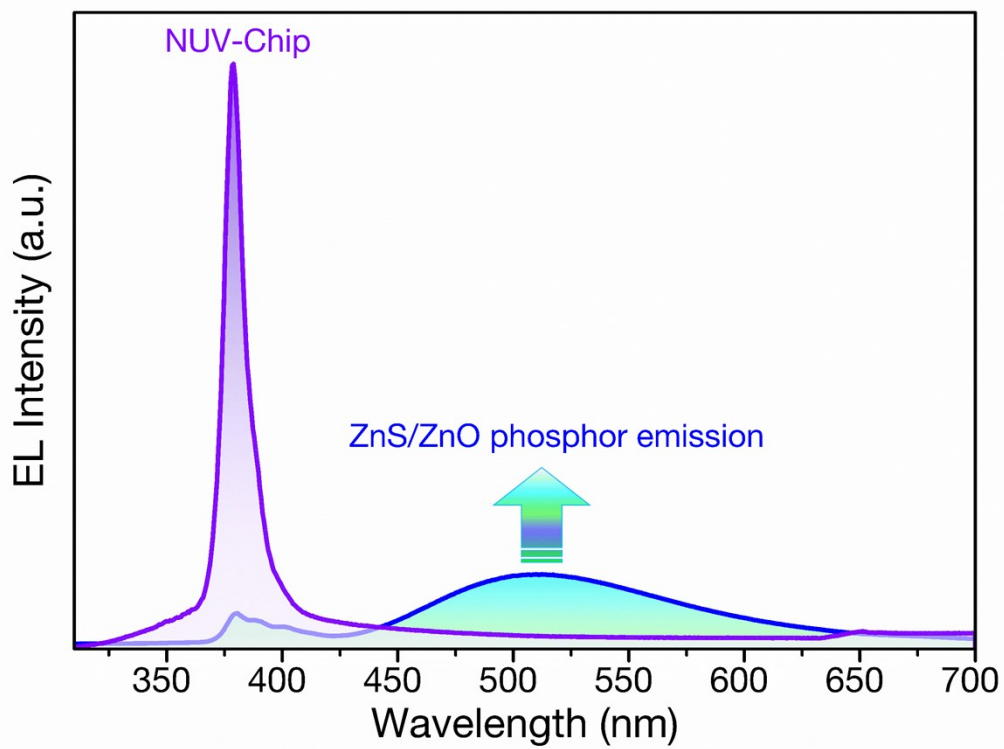

**Fig. S5.** EL spectrum of NUV (370 nm) chip and NUV-pumped ZnS/ZnO phosphor-coated NUV chip.
